# Supplementary material
Source: PubMed Central journal article supplement (PMC4718891)
Supplement: NIHMS733233-supplement-2.pdf [file NIHMS733233-supplement-2.pdf]

**Supplementary table 1.** Mouse strain information and expected expression patterns.

| Mouse strain                              | Commercial strain name - if applicable                             | Stock number - if applicable | Full gene name (source organism)                    | Expected expression pattern - cell types or tissues                                               | References |
|-------------------------------------------|--------------------------------------------------------------------|------------------------------|-----------------------------------------------------|---------------------------------------------------------------------------------------------------|------------|
| <i>UBC</i> <sup>eGFP</sup>                | C57BL/6-Tg(UBC-GFP)30Scha/J                                        | 004353                       | Ubiquitin C (human)                                 | All nucleated cells                                                                               | 30         |
| <i>ACTB</i> <sup>eGFP</sup>               | C57BL/6-Tg(CAG-EGFP)131Osb/LeySopJ                                 | 006567                       | Actin, beta (chicken)                               | All nucleated cells                                                                               | 31         |
| <i>Itgax</i> <sup>eYFP</sup>              | B6.Cg-Tg(Itgax-Venus)1Mnz/J                                        | 008829                       | Integrin alpha X (mouse)                            | Dendritic cells                                                                                   | 32         |
| <i>Aire</i> <sup>eGFP</sup>               | n.a.                                                               | n.a.                         | Autoimmune regulator (mouse)                        | Medullary thymic epithelial cells and rare extrathymic, Aire-expressing bone-marrow-derived cells | 36         |
| <i>Cdh1</i> <sup>CFP</sup>                | B6.129P2(Cg)- <i>Cdh1</i> <sup>tm1Cle/J</sup>                      | 016933                       | Cadherin 1 (mouse)                                  | Many epithelial cell types, including medullary thymic epithelial cells                           | 35         |
| <i>Chat</i> <sup>eGFP</sup>               | B6.Cg-Tg(RP23-268L19-EGFP)2Mik/J                                   | 007902                       | Choline acetyltransferase (mouse)                   | Central and peripheral cholinergic neurons and medullary thymic epithelial cells                  | 33, 34     |
| <i>Pcp2</i> <sup>eGFP</sup>               | STOCK Tg(Pcp2-EGFP)BT153Gsat/Mmmh                                  | 000247-MU                    | Purkinje cell protein 2 (L7) (mouse)                | Cerebellar Purkinje neurons                                                                       | 25         |
| <i>Myh11</i> <sup>eGFP</sup>              | B6.Cg-Tg(Myh11-cre,-EGFP)2Mik/J ( <i>Myh11</i> <sup>eGFP</sup> )   | 007742                       | Myosin, heavy polypeptide 11, smooth muscle (mouse) | Vascular and nonvascular smooth muscle, and some medullary thymic epithelial cells                | 24, 52     |
| <i>Ins2</i> <sup>eGFP</sup>               | n.a.                                                               | n.a.                         | Insulin II (mouse)                                  | Pancreatic beta cells and some medullary thymic epithelial cells                                  | 19, 22     |
| <i>CD207</i> <sup>eYFP</sup> <sub>P</sub> | <i>CD207</i> <sup>Cre</sup> x B6.129X1-Gt(ROSA)26Sortm1(EYFP)Cos/J | n.a.<br>006148               | CD207 molecule, langerin (human)                    | Epidermal Langerhans cells and some thymic dendritic cells                                        | 23         |
| <i>Zfp423</i> <sup>eGF</sup> <sub>P</sub> | B6;FVB-Tg(Zfp423-EGFP)7Brsp/J                                      | 019381                       | Zinc finger protein 423 (mouse)                     | Preadipocytes, and some medullary thymic epithelial cells                                         | 24, 51     |
| <i>Foxp3</i> <sup>eGFP</sup>              | n.a.                                                               | n.a.                         | Forkhead box P3 (mouse)                             | Regulatory T cells in the thymus and secondary lymphoid organs                                    | 53         |
| <i>Foxd1</i> <sup>eGFP</sup>              | B6;129S4- <i>Foxd1</i> <sup>tm1(GFP/cre)Amc/J</sup>                | 012463                       | Forkhead box D1 (mouse)                             | Stroma of developing kidneys and eyes                                                             | 20, 21     |
| <i>Ins1</i> <sup>eGFP</sup>               | B6.Cg-Tg(Ins1-EGFP)1Hara/J                                         | 006864                       | Insulin I (mouse)                                   | Pancreatic beta cells                                                                             | 18         |

n.a. = not applicable
